# Supplementary material for: Selection of Metastatic Breast Cancer Cell-Specific Aptamers for the Capture of CTCs with a Metastatic Phenotype by Cell-SELEX
Source: PubMed Central journal article supplement — Mol Ther Nucleic Acids. 2018 Jul 19;12:707–17. doi: 10.1016/j.omtn.2018.07.008 (PMC6083002; doi:10.1016/j.omtn.2018.07.008), 2018-07-19
Supplement: mmc1.pdf [file mmc1.pdf]

**OMTN, Volume 12**

**Supplemental Information**

**Selection of Metastatic Breast Cancer  
Cell-Specific Aptamers for the Capture of CTCs  
with a Metastatic Phenotype by Cell-SELEX  
Wan-Ming Li, Lin-Lin Zhou, Min Zheng, and Jin Fang**

## A, Supplemental Figures

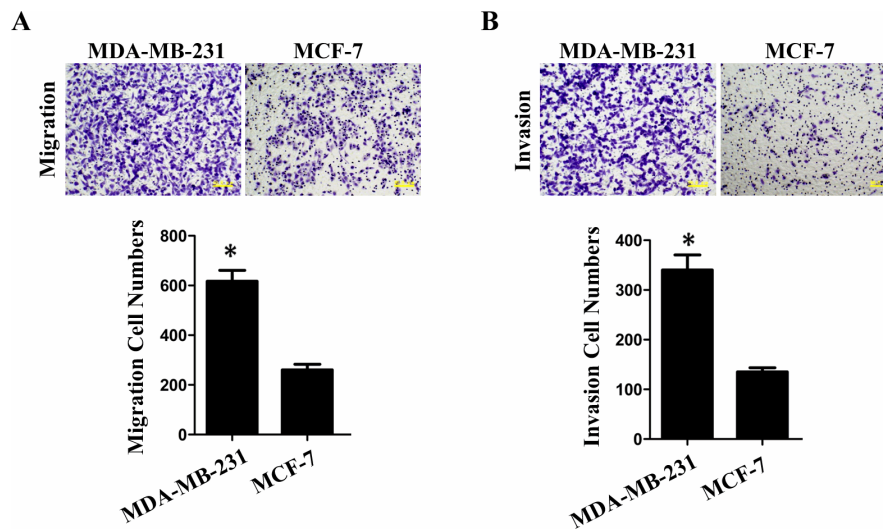

**Figure S1. Migration (A) and invasion (B) ability analysis of MDA-MB-231 and MCF-7 cells.** Values shown are mean  $\pm$  SD of three independent experiments. \* $p < 0.05$ .

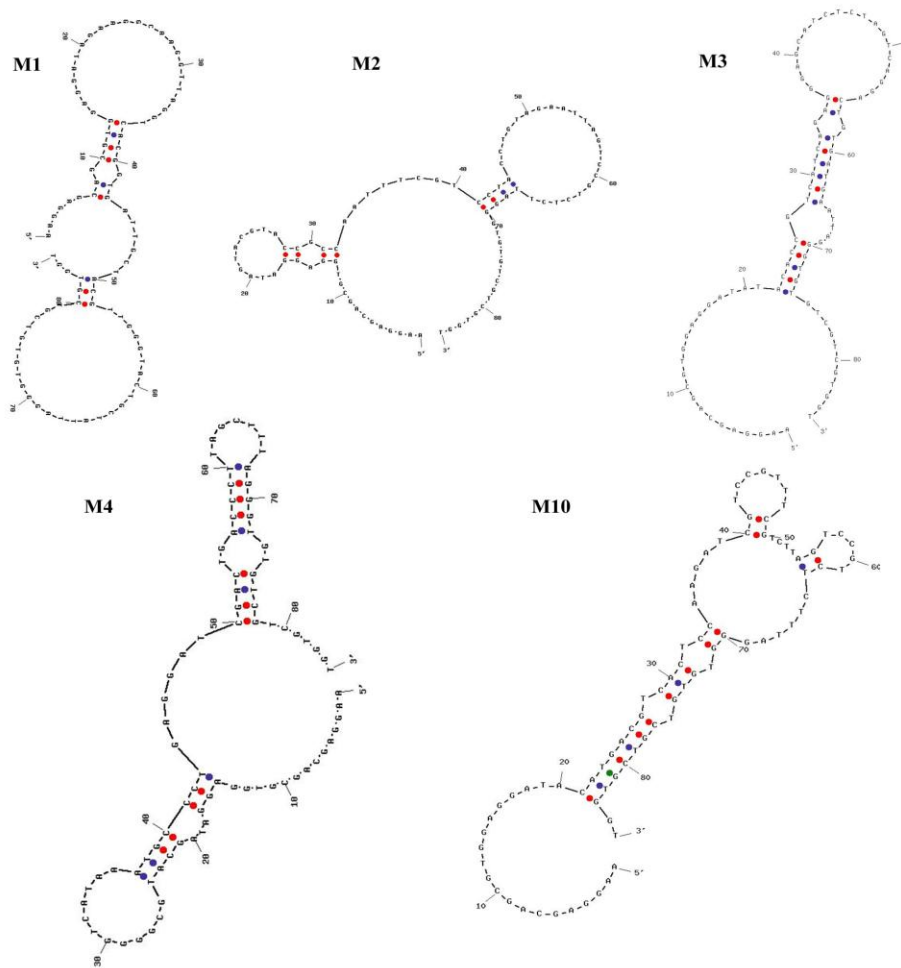

**Figure S2. The Secondary structures of aptamers (M1, M2, M3, M4 and M10) were predicted with Oligo Analyser.**

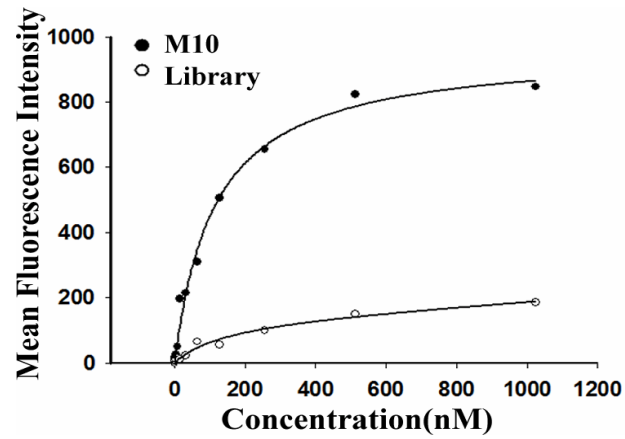

**Figure S3. Binding saturation curves of aptamer M10 to target MDA-MB-231 cells.** The cells were incubated with increasing concentrations of FITC-labeled aptamer M10 and assessed by flow cytometry. The  $K_D$  value of M10 was obtained by Sigma Plot software according to  $Y = B_{\max} \times X / (K_D + X)$ . The ssDNA library was used as negative control. At least three independent experiments were conducted.

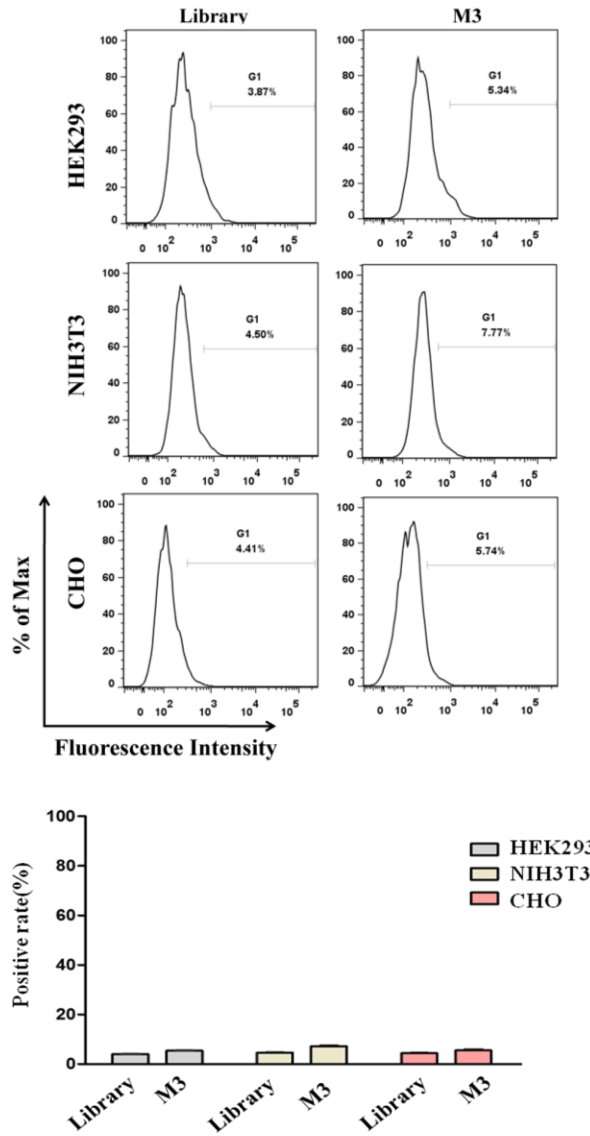

**Figure S4. Specificity of M3 to normal cell lines by flow cytometry.** The FITC-labeled M3 were incubated with HEK293, NIH3T3, and CHO cells for 30 min at 4 °C. Then, the fluorescence intensity was determined by flow cytometry. The ssDNA library was used as negative control. At least three independent experiments were conducted. The values represent the mean  $\pm$  SD of three independent experiments.

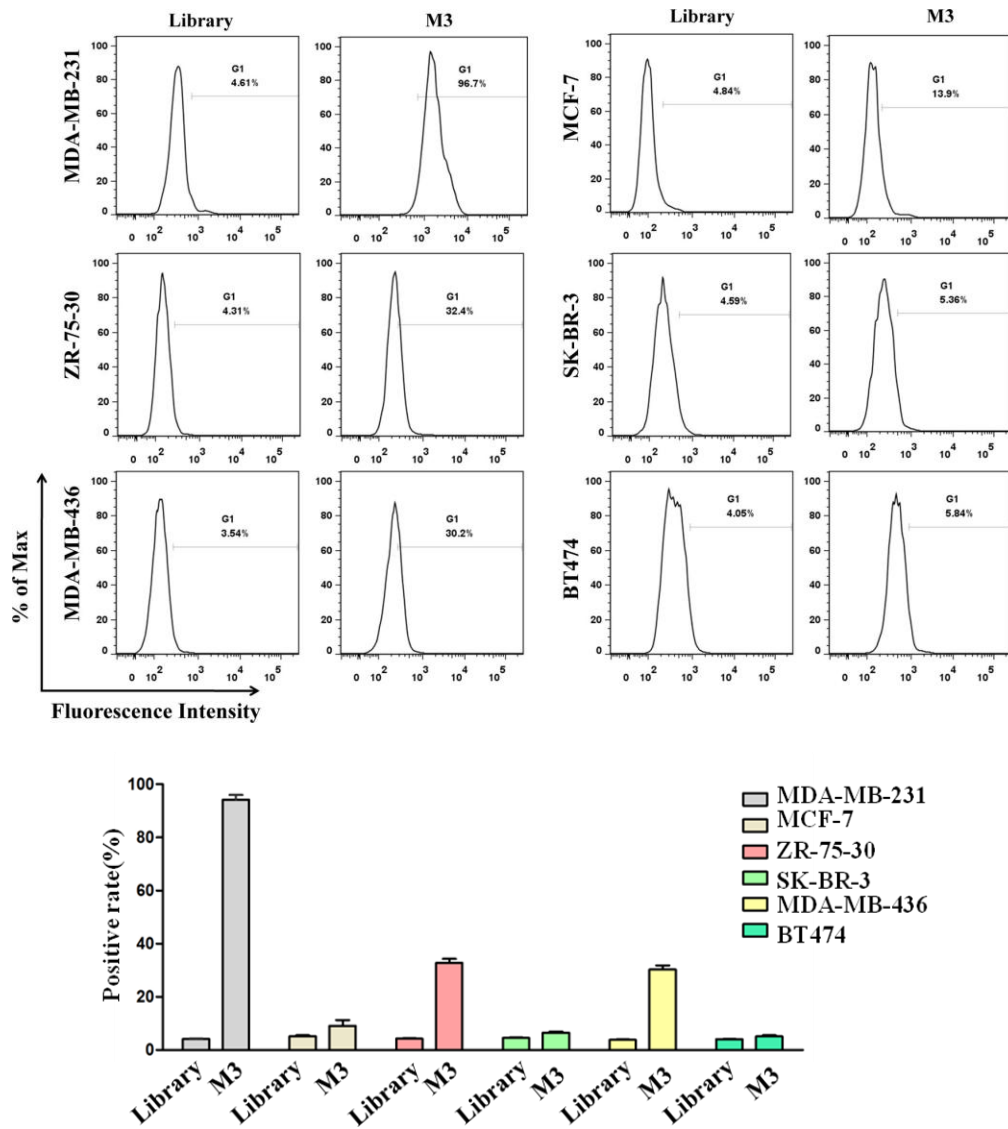

**Figure S5. Specificity of M3 to breast cancer cell lines by flow cytometry.** The FITC-labeled M3 were incubated with MDA-MB-231, MCF-7, ZR-75-30, SK-BR-3, MDA-MB-436, and BT474 cells for 30 min at 4 °C. Then, the fluorescence intensity was determined by flow cytometry. The ssDNA library was used as negative control. At least three independent experiments were conducted. The values represent the mean  $\pm$  SD of three independent experiments.

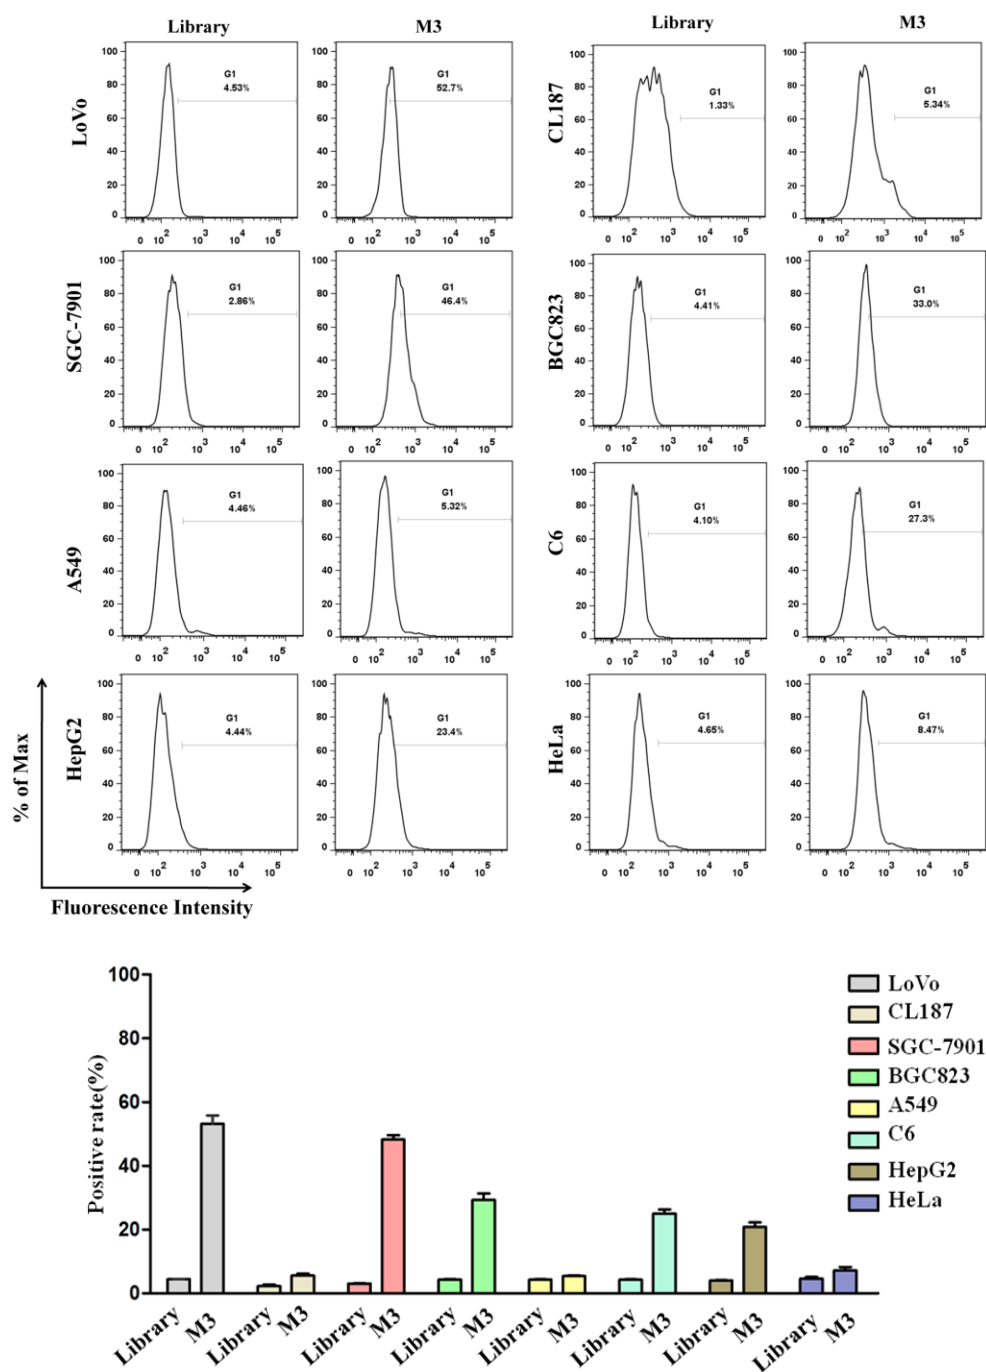

**Figure S6. Specificity of M3 to other cancer cell lines by flow cytometry.** The FITC-labeled M3 were incubated with LoVo, CL187, SGC-7901, BGC823, A549, C6, HepG2, and HeLa cells for 30 min at 4 °C. Then, the fluorescence intensity was determined by flow cytometry. The ssDNA library was used as negative control. At least three independent experiments were conducted. The values represent the mean  $\pm$  SD of three independent experiments.

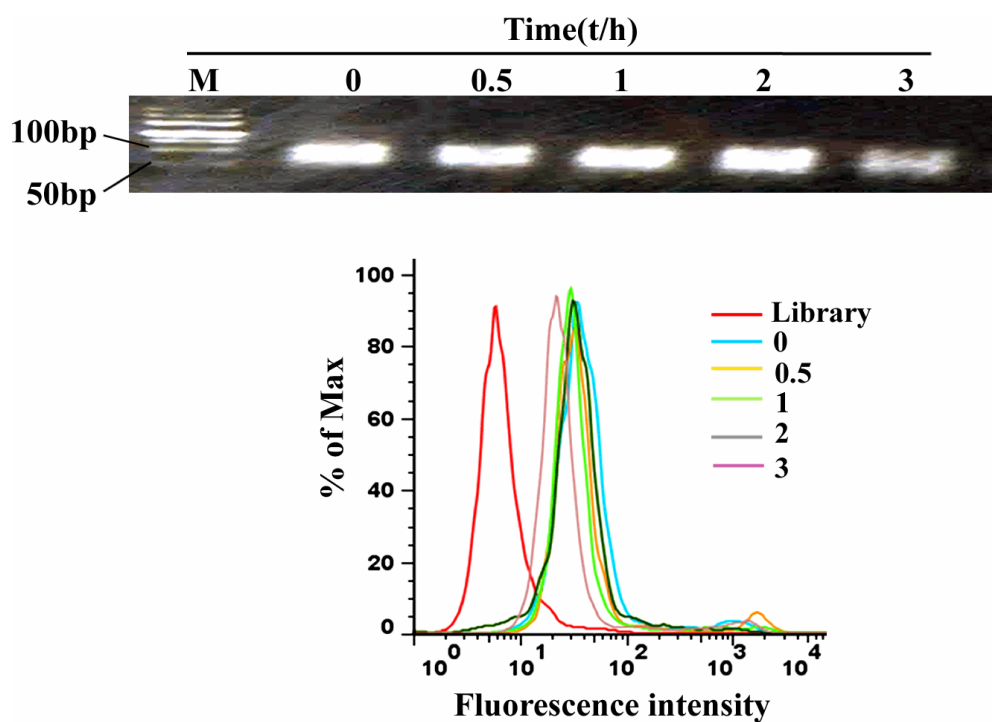

**Figure S7. Stability of M3 in plasma at different times.** The aptamer M3 was added to the plasma at 37 °C for 0.5, 1, 2, or 3 h. Finally, the M3 in plasma was separated by 3% agarose gel electrophoresis, and the DNA integrity was observed under UV spectrophotometry. The binding capacity of M3 to MDA-MB-231 cells after different time incubation in plasma was analyzed by flow cytometry. At least three independent experiments were conducted.



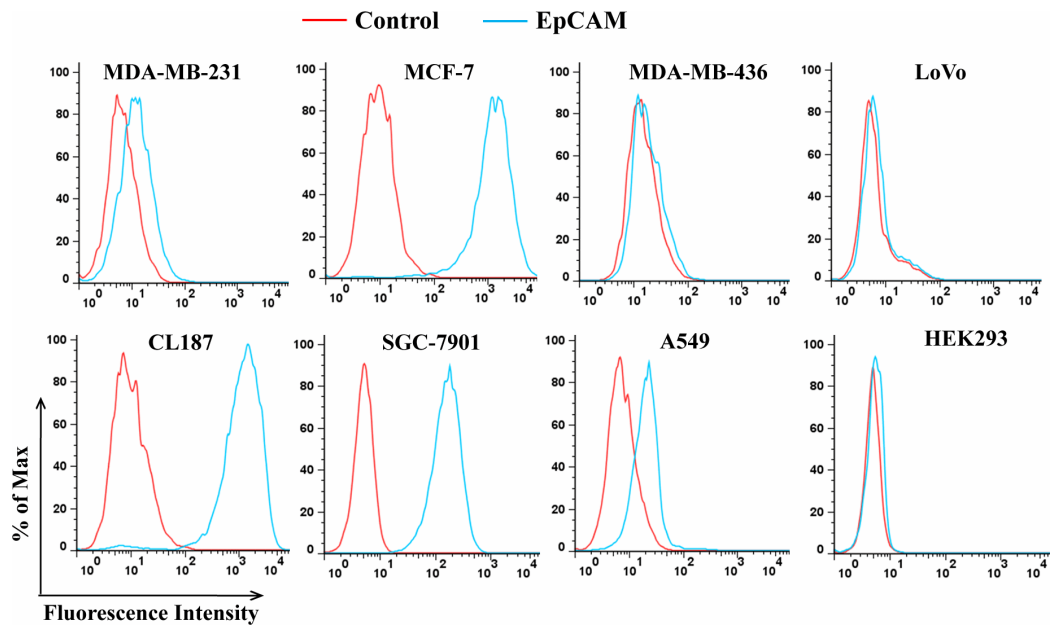

**Figure S8. EpCAM expression in various cell lines by flow cytometry.** The PE-anti-EpCAM was incubated with MDA-MB-231, MCF-7, MDA-MB-436, LoVo, CL187, SGC-7901, A549 and HEK293 cells for 1 h at 4 °C. Then, the fluorescence intensity was determined by flow cytometry. At least three independent experiments were conducted.

## B, Supplemental Tables

**Table S1. Aptamer r sequences and frequency**

| <b>Name</b> | <b>Sequence</b>                                                                            | <b>Frequency<br/>(50 clones)</b> |
|-------------|--------------------------------------------------------------------------------------------|----------------------------------|
| <b>M1</b>   | AAGGAGCAGCGTGGAGGATAGAAGGCAAGGTTAGGTCACGGTGATTGCT<br>ACGTTGGGTACTGCTATTAGGGTGTGTCGTTCGTGGT | <b>4</b>                         |
| <b>M2</b>   | AAGGAGCAGCGTGGAGGATAGTACGTACCGCCAATTCGTCCTACCTGTA<br>GAATTAGTCCGTCTCTTAGGGTGTGTCGTTCGTGGT  | <b>7</b>                         |
| <b>M3</b>   | AAGGAGCAGCGTGGAGGATATACACCGTCATCAGAGGGAGCATCTCTAGT<br>CAGGACTGTGATGAATTAGGGTGTGTCGTTCGTGGT | <b>4</b>                         |
| <b>M4</b>   | AAGGAGCAGCGTGGAGGATACGATGCGGGGTCATAAATGCCCTGGGGATC<br>GACTGACCCTTAGCTTTAGGGTGTGTCGTTCGTGGT | <b>4</b>                         |
| <b>M10</b>  | AAGGAGCAGCGTGGAGGATACATGACGTCACTCTAAGATCGTCCGTTTCG<br>TCTTAGTCCGTCTCTTTAGGGTGTGTCGTTCGTGGT | <b>10</b>                        |

**Table S2. CTC numbers and tumor metastasis in patients**

| <b>Patient number</b> | <b>Numbers of M3 positive CTC</b> | <b>Metastasis characteristics</b>                           |
|-----------------------|-----------------------------------|-------------------------------------------------------------|
| 001                   | 2                                 | Distal metastasis(liver, bone), lymph node metastasis       |
| 002                   | 2                                 | Lymph node metastasis                                       |
| 003                   | 7                                 | Distal metastasis(lung), lymph node metastasis              |
| 004                   | 0                                 | Lymph node metastasis                                       |
| 005                   | 1                                 | No                                                          |
| 006                   | 3                                 | Distal metastasis(bone, lung), lymph node metastasis        |
| 007                   | 0                                 | Lymph node metastasis                                       |
| 008                   | 2                                 | Distal metastasis(brain), lymph node metastasis             |
| 009                   | 0                                 | No                                                          |
| 010                   | 0                                 | No                                                          |
| 011                   | 3                                 | Distal metastasis(bone), lymph node metastasis              |
| 012                   | 0                                 | No                                                          |
| 013                   | 0                                 | No                                                          |
| 014                   | 0                                 | No                                                          |
| 015                   | 0                                 | No                                                          |
| 016                   | 4                                 | Distal metastasis(bone, lung), lymph node metastasis        |
| 017                   | 0                                 | Lymph node metastasis                                       |
| 018                   | 3                                 | Lymph node metastasis                                       |
| 019                   | 0                                 | No                                                          |
| 020                   | 0                                 | No                                                          |
| 021                   | 0                                 | Lymph node metastasis                                       |
| 022                   | 5                                 | Distal metastasis(liver, bone, lung)                        |
| 023                   | 0                                 | No                                                          |
| 024                   | 0                                 | No                                                          |
| 025                   | 8                                 | Distal metastasis(lung, liver, bone), lymph node metastasis |

**Table S3. Comparison of binding assays of M3 and anti-EpCAM to different cell**

**lines**

|              | MDA-MB-231 | MCF-7 | MDA-MB-436 | LoVo | CL187 | SGC-7901 | A549 | HEK293 |
|--------------|------------|-------|------------|------|-------|----------|------|--------|
| <b>M3</b>    | ++++       | -     | +          | ++   | -     | ++       | -    | -      |
| <b>EpCAM</b> | +          | ++++  | -          | -    | ++++  | ++++     | ++   | -      |

- ,<14%; +, 15-35%; ++, 36-60%; +++++, >85%.

### **C, Supplemental Materials and Methods**

**Transwell assays.** MDA-MB-231 or MCF-7 cells ( $1 \times 10^5$  cells in 100  $\mu\text{L}$  free FBS DMEM) were placed in the top chamber of transwell chambers (8  $\mu\text{m}$  BioCoat Control Inserts, Becton Dickinson Labware, Bedford, MA). The lower chamber was filled with 600  $\mu\text{L}$  DMEM containing 10% FBS. After 24 h, un-migrated cells were removed from the upper surface of the transwell membrane with a cotton swab, and migrated cells on the lower membrane surface were fixed, stained, photographed, and counted under a light microscope. To detect invasiveness, diluted Matrigel was loaded on the membranes of the transwell chambers and performed as above.
